# Supplementary material
Source: Springer Nature journal article supplement (https://www.springermedizin.de/resource/supplementary/13058_2010_2755_MOESM4_ESM.pdf/9702084)
Supplement: MOESM4 [file 9702084]

**Additional file 4. Distribution of allele loss in tumors with LOH**

|                            | Expected           |                   | Observed           |                   | Chi-Square<br>p value |
|----------------------------|--------------------|-------------------|--------------------|-------------------|-----------------------|
|                            | LOH <sup>mut</sup> | LOH <sup>wt</sup> | LOH <sup>mut</sup> | LOH <sup>wt</sup> |                       |
| All tumors with LOH (n=72) | 36                 | 36                | 7                  | 65                | < 0.001               |
| ER- tumors with LOH (n=34) | 17                 | 17                | 3                  | 31                | < 0.001               |
| ER+ tumors with LOH (n=38) | 19                 | 19                | 4                  | 34                | < 0.001               |
